# Supplementary material for: Poor-tasting pediatric medicines: Part 1. A scoping review of their impact on patient acceptability, medication adherence, and treatment outcomes
Source: Frontiers journal article supplement (doi:10.3389/fddev.2025.1553286), 2025-04-22
Supplement: Data_Sheet_1.pdf [file Data_Sheet_1.pdf]

# Poor-tasting pediatric medicines: Part 1. A scoping review of their impact on patient acceptability, medication adherence, and treatment outcomes

## Supplementary Material

### 1 Supplementary Tables

**Table S1.** PRISMA-ScR Checklist with items and criteria recommended for transparent and comprehensive reporting of scoping reviews.

| SECTION                          | ITEM | PRISMA-ScR CHECKLIST ITEM                                                                                                                                                                                                                                                 | REPORTED                                     |
|----------------------------------|------|---------------------------------------------------------------------------------------------------------------------------------------------------------------------------------------------------------------------------------------------------------------------------|----------------------------------------------|
| <b>TITLE</b>                     |      |                                                                                                                                                                                                                                                                           |                                              |
| Title                            | 1    | Identify the report as a scoping review.                                                                                                                                                                                                                                  | Title                                        |
| <b>ABSTRACT</b>                  |      |                                                                                                                                                                                                                                                                           |                                              |
| Structured summary               | 2    | Provide a structured summary that includes (as applicable): background, objectives, eligibility criteria, sources of evidence, charting methods, results, and conclusions that relate to the review questions and objectives.                                             | Abstract                                     |
| <b>INTRODUCTION</b>              |      |                                                                                                                                                                                                                                                                           |                                              |
| Rationale                        | 3    | Describe the rationale for the review in the context of what is already known. Explain why the review questions/objectives lend themselves to a scoping review approach.                                                                                                  | Introduction                                 |
| Objectives                       | 4    | Provide an explicit statement of the questions and objectives being addressed with reference to their key elements (e.g., population or participants, concepts, and context) or other relevant key elements used to conceptualize the review questions and/or objectives. | Introduction                                 |
| <b>METHODS</b>                   |      |                                                                                                                                                                                                                                                                           |                                              |
| Protocol and registration        | 5    | Indicate whether a review protocol exists; state if and where it can be accessed (e.g., a Web address); and if available, provide registration information, including the registration number.                                                                            | Methods; registration n/a for scoping review |
| Eligibility criteria             | 6    | Specify characteristics of the sources of evidence used as eligibility criteria (e.g., years considered, language, and publication status), and provide a rationale.                                                                                                      | Methods 2.1                                  |
| Information sources              | 7    | Describe all information sources in the search (e.g., databases with dates of coverage and contact with authors to identify additional sources), as well as the date the most recent search was executed.                                                                 | Methods 2.2 & Supplementary Table S2         |
| Search                           | 8    | Present the full electronic search strategy for at least 1 database, including any limits used, such that it could be repeated.                                                                                                                                           | Methods 2.2 & Supplementary Table S3         |
| Selection of sources of evidence | 9    | State the process for selecting sources of evidence (i.e., screening and eligibility) included in the scoping review.                                                                                                                                                     | Methods 2.3                                  |

| SECTION                                              | ITEM | PRISMA-ScR CHECKLIST ITEM                                                                                                                                                                                                                                                                                  | REPORTED                                         |
|------------------------------------------------------|------|------------------------------------------------------------------------------------------------------------------------------------------------------------------------------------------------------------------------------------------------------------------------------------------------------------|--------------------------------------------------|
| Data charting process                                | 10   | Describe the methods of charting data from the included sources of evidence (e.g., calibrated forms or forms that have been tested by the team before their use, and whether data charting was done independently or in duplicate) and any processes for obtaining and confirming data from investigators. | Methods 2.4                                      |
| Data items                                           | 11   | List and define all variables for which data were sought and any assumptions and simplifications made.                                                                                                                                                                                                     | Methods 2.4 & Supplementary Table S4             |
| Critical appraisal of individual sources of evidence | 12   | If done, provide a rationale for conducting a critical appraisal of included sources of evidence; describe the methods used and how this information was used in any data synthesis (if appropriate).                                                                                                      | Methods 2.5 & Supplementary Table S5             |
| Synthesis of results                                 | 13   | Describe the methods of handling and summarizing the data that were charted.                                                                                                                                                                                                                               | Methods 2.5                                      |
| <b>RESULTS</b>                                       |      |                                                                                                                                                                                                                                                                                                            |                                                  |
| Selection of sources of evidence                     | 14   | Give numbers of sources of evidence screened, assessed for eligibility, and included in the review, with reasons for exclusions at each stage, ideally using a flow diagram.                                                                                                                               | Results 3.1 & Figure 2                           |
| Characteristics of sources of evidence               | 15   | For each source of evidence, present characteristics for which data were charted and provide the citations.                                                                                                                                                                                                | Results 3.2, Figure 3 & Supplementary Table S6   |
| Critical appraisal within sources of evidence        | 16   | If done, present data on critical appraisal of included sources of evidence (see item 12).                                                                                                                                                                                                                 | N/A                                              |
| Results of individual sources of evidence            | 17   | For each included source of evidence, present the relevant data that were charted that relate to the review questions and objectives.                                                                                                                                                                      | Results 3.3 – 3.6 & Supplementary Tables S7 & S8 |
| Synthesis of results                                 | 18   | Summarize and/or present the charting results as they relate to the review questions and objectives.                                                                                                                                                                                                       | Results 3.3 – 3.6                                |
| <b>DISCUSSION</b>                                    |      |                                                                                                                                                                                                                                                                                                            |                                                  |
| Summary of evidence                                  | 19   | Summarize the main results (including an overview of concepts, themes, and types of evidence available), link to the review questions and objectives, and consider the relevance to key groups.                                                                                                            | Discussion 4.1 – 4.4                             |
| Limitations                                          | 20   | Discuss the limitations of the scoping review process.                                                                                                                                                                                                                                                     | Discussion 4.5                                   |
| Conclusions                                          | 21   | Provide a general interpretation of the results with respect to the review questions and objectives, as well as potential implications and/or next steps.                                                                                                                                                  | Discussion 4.6                                   |
| <b>FUNDING</b>                                       |      |                                                                                                                                                                                                                                                                                                            |                                                  |
| Funding                                              | 22   | Describe sources of funding for the included sources of evidence, as well as sources of funding for the scoping review. Describe the role of the funders of the scoping review.                                                                                                                            | Funding                                          |

**Table S2** Keywords and index search terms used based on Population-Exposure-Outcome (PEO) framework

| PEO Framework Item | Criteria                                              | Keywords/Search Terms                                                                                               |
|--------------------|-------------------------------------------------------|---------------------------------------------------------------------------------------------------------------------|
| Population         | Children 0-18 years                                   | Pediatrics<br>Infant, Child, Adolescent                                                                             |
| Exposure           | Administration of an oral unpalatable medicine        | Palatability, Taste, Smell, Texture, Mouthfeel, Bitter, Aversive Medication, Drug Therapy, Formulation, Dosage form |
| Outcome            | Non-acceptance<br>Non-adherence<br>Treatment Outcomes | Acceptability<br>Adherence, Compliance, Concordance<br>Treatment Outcomes                                           |

**Table S3** Full database search strategies

| Search Query                                                                                                                                                                                                                                                                                                                                                                                                                                                                                                                                                                                                                                   |                                                                              | Results |
|------------------------------------------------------------------------------------------------------------------------------------------------------------------------------------------------------------------------------------------------------------------------------------------------------------------------------------------------------------------------------------------------------------------------------------------------------------------------------------------------------------------------------------------------------------------------------------------------------------------------------------------------|------------------------------------------------------------------------------|---------|
| <b>Medline via PubMed</b>                                                                                                                                                                                                                                                                                                                                                                                                                                                                                                                                                                                                                      |                                                                              |         |
| Search: ((((((pediatric) OR (child)) OR (infant)) OR (adolescent)) AND ((((((palatab*) OR (taste)) OR (smell)) OR (texture)) OR (mouthfeel)) OR (bitter)) OR (avers*))) AND (((((drug therapy) OR (drug formulation)) OR (drug dosage form)) OR (medication))) AND (((adherence) OR (medication compliance)) OR (accept*)) OR (treatment outcome)) Filters: English                                                                                                                                                                                                                                                                            |                                                                              | 1563    |
| <b>Translations</b>                                                                                                                                                                                                                                                                                                                                                                                                                                                                                                                                                                                                                            |                                                                              |         |
| <b>pediatric:</b> "paediatrics"[All Fields] OR "pediatrics"[MeSH Terms] OR "pediatrics"[All Fields] OR "paediatric"[All Fields] OR "pediatric"[All Fields]                                                                                                                                                                                                                                                                                                                                                                                                                                                                                     |                                                                              |         |
| <b>child:</b> "child"[MeSH Terms] OR "child"[All Fields] OR "children"[All Fields] OR "child's"[All Fields] OR "children's"[All Fields] OR "childrens"[All Fields] OR "childs"[All Fields]                                                                                                                                                                                                                                                                                                                                                                                                                                                     |                                                                              |         |
| <b>infant:</b> "infant"[MeSH Terms] OR "infant"[All Fields] OR "infants"[All Fields] OR "infant's"[All Fields]                                                                                                                                                                                                                                                                                                                                                                                                                                                                                                                                 |                                                                              |         |
| <b>adolescent:</b> "adolescences"[All Fields] OR "adolescence"[All Fields] OR "adolescent"[MeSH Terms] OR "adolescent"[All Fields] OR "adolescences"[All Fields] OR "adolescents"[All Fields] OR "adolescent's"[All Fields]                                                                                                                                                                                                                                                                                                                                                                                                                    |                                                                              |         |
| <b>taste:</b> "taste"[MeSH Terms] OR "taste"[All Fields] OR "tastes"[All Fields] OR "tasting"[All Fields] OR "tasted"[All Fields] OR "tasteful"[All Fields] OR "tastings"[All Fields]                                                                                                                                                                                                                                                                                                                                                                                                                                                          |                                                                              |         |
| <b>smell:</b> "smell"[MeSH Terms] OR "smell"[All Fields] OR "smelled"[All Fields] OR "smelling"[All Fields] OR "smells"[All Fields]                                                                                                                                                                                                                                                                                                                                                                                                                                                                                                            |                                                                              |         |
| <b>texture:</b> "textural"[All Fields] OR "texturally"[All Fields] OR "texture"[All Fields] OR "texture's"[All Fields] OR "textured"[All Fields] OR "textures"[All Fields] OR "texturing"[All Fields] OR "texturization"[All Fields] OR "texturize"[All Fields] OR "texturized"[All Fields] OR "texturizing"[All Fields]                                                                                                                                                                                                                                                                                                                       |                                                                              |         |
| <b>bitter:</b> "aversive agents"[Pharmacological Action] OR "aversive agents"[MeSH Terms] OR ("aversive"[All Fields] AND "agents"[All Fields]) OR "aversive agents"[All Fields] OR "bitterants"[All Fields] OR "bitter"[All Fields] OR "bitterant"[All Fields] OR "bitterness"[All Fields] OR "bitters"[All Fields]                                                                                                                                                                                                                                                                                                                            |                                                                              |         |
| <b>drug therapy:</b> "drug therapy"[Subheading] OR ("drug"[All Fields] AND "therapy"[All Fields]) OR "drug therapy"[All Fields] OR "drug therapy"[MeSH Terms] OR ("drug"[All Fields] AND "therapy"[All Fields])                                                                                                                                                                                                                                                                                                                                                                                                                                |                                                                              |         |
| <b>drug formulation:</b> "drug compounding"[MeSH Terms] OR ("drug"[All Fields] AND "compounding"[All Fields]) OR "drug compounding"[All Fields] OR ("drug"[All Fields] AND "formulation"[All Fields]) OR "drug formulation"[All Fields]                                                                                                                                                                                                                                                                                                                                                                                                        |                                                                              |         |
| <b>dosage form:</b> "dosage forms"[MeSH Terms] OR ("dosage"[All Fields] AND "forms"[All Fields]) OR "dosage forms"[All Fields] OR ("dosage"[All Fields] AND "form"[All Fields]) OR "dosage form"[All Fields]                                                                                                                                                                                                                                                                                                                                                                                                                                   |                                                                              |         |
| <b>medication:</b> "medic"[All Fields] OR "medical"[All Fields] OR "medicalization"[MeSH Terms] OR "medicalization"[All Fields] OR "medicalizations"[All Fields] OR "medicalize"[All Fields] OR "medicalized"[All Fields] OR "medicalizes"[All Fields] OR "medicalizing"[All Fields] OR "medically"[All Fields] OR "medicals"[All Fields] OR "medicated"[All Fields] OR "medication's"[All Fields] OR "medics"[All Fields] OR "pharmaceutical preparations"[MeSH Terms] OR ("pharmaceutical"[All Fields] AND "preparations"[All Fields]) OR "pharmaceutical preparations"[All Fields] OR "medication"[All Fields] OR "medications"[All Fields] |                                                                              |         |
| <b>adherence:</b> "adherence"[All Fields] OR "adhere"[All Fields] OR "adhered"[All Fields] OR "adherence"[All Fields] OR "adherences"[All Fields] OR "adherent"[All Fields] OR "adherents"[All Fields] OR "adherer"[All Fields] OR "adherers"[All Fields] OR "adheres"[All Fields] OR "adhering"[All Fields]                                                                                                                                                                                                                                                                                                                                   |                                                                              |         |
| <b>medication compliance:</b> "medication adherence"[MeSH Terms] OR ("medication"[All Fields] AND "adherence"[All Fields]) OR "medication adherence"[All Fields] OR ("medication"[All Fields] AND "compliance"[All Fields]) OR "medication compliance"[All Fields]                                                                                                                                                                                                                                                                                                                                                                             |                                                                              |         |
| <b>treatment outcome:</b> "treatment outcome"[MeSH Terms] OR ("treatment"[All Fields] AND "outcome"[All Fields]) OR "treatment outcome"[All Fields]                                                                                                                                                                                                                                                                                                                                                                                                                                                                                            |                                                                              |         |
| <b>EMBASE via OVID</b>                                                                                                                                                                                                                                                                                                                                                                                                                                                                                                                                                                                                                         |                                                                              |         |
| 1                                                                                                                                                                                                                                                                                                                                                                                                                                                                                                                                                                                                                                              | (Pediatric or Child or Infant or Adolescent).af.                             | 4445348 |
| 2                                                                                                                                                                                                                                                                                                                                                                                                                                                                                                                                                                                                                                              | (Palatab* or Taste or Smell or Texture or Mouthfeel or Bitter or Avers*).af. | 178677  |
| 3                                                                                                                                                                                                                                                                                                                                                                                                                                                                                                                                                                                                                                              | (Drug therapy or Drug formulation or Drug dosage form or Medication).af.     | 5729350 |
| 4                                                                                                                                                                                                                                                                                                                                                                                                                                                                                                                                                                                                                                              | (Adherence or Medication compliance or Accept* or Treatment outcome).af.     | 1985133 |
| 5                                                                                                                                                                                                                                                                                                                                                                                                                                                                                                                                                                                                                                              | 1 and 2 and 3 and 4                                                          | 1076    |

|                         |                                                                                             |                                       |           |
|-------------------------|---------------------------------------------------------------------------------------------|---------------------------------------|-----------|
| 6                       | limit 5 to English language                                                                 |                                       | 1018      |
| <b>CINAHL via EBSCO</b> |                                                                                             |                                       |           |
| S5                      | S1 AND S2 AND S3 AND S4                                                                     |                                       | 326       |
| S4                      | TX adherence OR TX medication compliance OR TX accept* OR TX treatment outcome              |                                       | 671,011   |
|                         |                                                                                             | Expanders - Apply equivalent subjects |           |
| S3                      | TX drug therapy OR TX drug formulation OR TX drug dosage form OR TX medication              | Narrow by Language: - English         | 2,819,393 |
| S2                      | TX palatab* OR TX taste OR TX smell OR TX texture OR TX mouthfeel OR TX bitter OR TX avers* | Search modes - Boolean/Phrase         | 24,051    |
| S1                      | TX pediatric OR TX child OR TX infant OR TX adolescent                                      |                                       | 1,624,310 |

**Table S4** Data extraction template used within the Covidence software

| General Information |                                                                                                                                                                                                                                                                                                                                                                                                                                                                                                                                                                                                                                                                                                                                                                                                                                                                                                                                                                                                                                                                                                                                                                                                                                                                                                          |
|---------------------|----------------------------------------------------------------------------------------------------------------------------------------------------------------------------------------------------------------------------------------------------------------------------------------------------------------------------------------------------------------------------------------------------------------------------------------------------------------------------------------------------------------------------------------------------------------------------------------------------------------------------------------------------------------------------------------------------------------------------------------------------------------------------------------------------------------------------------------------------------------------------------------------------------------------------------------------------------------------------------------------------------------------------------------------------------------------------------------------------------------------------------------------------------------------------------------------------------------------------------------------------------------------------------------------------------|
| 1                   | Title, Year, Author(s) – automatically captured in                                                                                                                                                                                                                                                                                                                                                                                                                                                                                                                                                                                                                                                                                                                                                                                                                                                                                                                                                                                                                                                                                                                                                                                                                                                       |
| 2                   | Country (If specified in text) OR Authors Country [Open Text]                                                                                                                                                                                                                                                                                                                                                                                                                                                                                                                                                                                                                                                                                                                                                                                                                                                                                                                                                                                                                                                                                                                                                                                                                                            |
| Study Details       |                                                                                                                                                                                                                                                                                                                                                                                                                                                                                                                                                                                                                                                                                                                                                                                                                                                                                                                                                                                                                                                                                                                                                                                                                                                                                                          |
| 3                   | <p>Overall Category [Multiple Tick Box]</p> <p> <input type="checkbox"/> Taste problem formally captured and directly linked to adherence or treatment outcome(s)<br/> <input type="checkbox"/> Taste problem formally captured and linked to acceptability/administration outcome(s)<br/> <input type="checkbox"/> Taste problem formally captured with potential (but not direct) link to outcome(s)<br/> <input type="checkbox"/> Taste problem formally captured but no impact on outcomes<br/> <input type="checkbox"/> Palatability not formally evaluated but linked to adherence or treatment outcome(s)<br/> <input type="checkbox"/> Palatability not formally evaluated but linked to acceptability/administration outcome(s)<br/> <input type="checkbox"/> Taste problem reported as adverse event (AE)<br/> <input type="checkbox"/> General statement about palatability<br/> <input type="checkbox"/> Palatability reported as barrier to adherence<br/> <input type="checkbox"/> Patient / caregiver experiences (general)<br/> <input type="checkbox"/> HCP experiences (general)<br/> <input type="checkbox"/> Specific palatability/acceptability study with children<br/> <input type="checkbox"/> Other [Open Text] </p> <p>Additional notes about overall category [Open Text]</p> |
| 4                   | <p>Was the palatability of a product/API formally evaluated? [Single Tick Box]</p> <p> <input type="radio"/> Yes - user questionnaire/survey, observation<br/> <input type="radio"/> Yes - taste problem reported as an AE<br/> <input type="radio"/> No but authors provide a general statement about palatability<br/> <input type="radio"/> No<br/> <input type="radio"/> Not applicable e.g. study not API or product specific<br/> <input type="radio"/> Other [Open Text] </p>                                                                                                                                                                                                                                                                                                                                                                                                                                                                                                                                                                                                                                                                                                                                                                                                                     |
| 5                   | <p>Was palatability specifically linked to an outcome by the authors? [Multiple Tick Box]</p> <p> <input type="checkbox"/> Yes - Acceptability/Administration<br/> <input type="checkbox"/> Yes - Adherence<br/> <input type="checkbox"/> Yes - Clinical Treatment Outcome<br/> <input type="checkbox"/> No<br/> <input type="checkbox"/> Other [Open Text] </p>                                                                                                                                                                                                                                                                                                                                                                                                                                                                                                                                                                                                                                                                                                                                                                                                                                                                                                                                         |
| 6                   | <p>Study Design [Multiple Tick Box]</p> <p> <input type="checkbox"/> Interventional - uncontrolled (no comparison between interventions)<br/> <input type="checkbox"/> Interventional - randomised control trial<br/> <input type="checkbox"/> Interventional - non-randomised control trial<br/> <input type="checkbox"/> Observational - Cohort Prospective<br/> <input type="checkbox"/> Observational - Cohort Retrospective<br/> <input type="checkbox"/> Observational - Case-Control Retrospective<br/> <input type="checkbox"/> Observational - Cross Sectional<br/> <input type="checkbox"/> Observational - Non-comparative (case series, case study)<br/> <input type="checkbox"/> Other [Open Text] </p> <p>Additional notes about overall category [Open Text]</p>                                                                                                                                                                                                                                                                                                                                                                                                                                                                                                                          |
| 7                   | <p>Methods [Multiple Tick Box]</p> <p> <input type="checkbox"/> Questionnaire/Survey<br/> <input type="checkbox"/> Observation </p>                                                                                                                                                                                                                                                                                                                                                                                                                                                                                                                                                                                                                                                                                                                                                                                                                                                                                                                                                                                                                                                                                                                                                                      |

|                                                     |                                                                                                                                                                                                                                                                    |
|-----------------------------------------------------|--------------------------------------------------------------------------------------------------------------------------------------------------------------------------------------------------------------------------------------------------------------------|
|                                                     | <input type="checkbox"/> Semi-structured Interview Focus Group<br><input type="checkbox"/> Chart Review<br><input type="checkbox"/> Other [Open Text]                                                                                                              |
| 8                                                   | Study Respondent [Multiple Tick Box]<br><input type="checkbox"/> Child<br><input type="checkbox"/> Primary adult caregiver<br><input type="checkbox"/> Healthcare provider<br><input type="checkbox"/> Author report<br><input type="checkbox"/> Other [Open Text] |
| <b>Pediatric Population</b>                         |                                                                                                                                                                                                                                                                    |
| 9                                                   | Overall Category [Open Text]<br>Age – Mean<br>Age - Median<br>Age - Range<br>Sex - Female %<br>Sex - Male %<br>Total number of participants<br>Healthy Volunteers?<br>Any additional notes about study participants [Open Text]                                    |
| <b>Medicinal Product &amp; Disease</b>              |                                                                                                                                                                                                                                                                    |
| 10                                                  | Therapeutic area (e.g. HIV, malaria, TB) [Open Text]                                                                                                                                                                                                               |
| 11                                                  | Drug, Dosage form, Additional Product Information [Table]                                                                                                                                                                                                          |
| <b>Formal Palatability/Acceptability Evaluation</b> |                                                                                                                                                                                                                                                                    |
| 12                                                  | Outcome type [Single Tick Box]<br><input type="radio"/> Primary<br><input type="radio"/> Secondary<br><input type="radio"/> Other [Open Text]                                                                                                                      |
| 13                                                  | Methods (E.g. scale - VAS, Hedonic, Likert) [Open Text]                                                                                                                                                                                                            |
| 14                                                  | Respondent for palatability/acceptability assessment [Multiple Tick Box]<br><input type="checkbox"/> Child<br><input type="checkbox"/> Caregiver<br><input type="checkbox"/> Healthcare provider<br><input type="checkbox"/> Other                                 |
| 15                                                  | Results [Open Text]                                                                                                                                                                                                                                                |
| <b>General Palatability/Acceptability Reports</b>   |                                                                                                                                                                                                                                                                    |
| 16                                                  | Methods (e.g. questionnaire, interview, focus group) [Open Text]                                                                                                                                                                                                   |
| 17                                                  | Results [Open Text]<br>Any additional notes about palatability [Open Text]                                                                                                                                                                                         |
| <b>Adherence</b>                                    |                                                                                                                                                                                                                                                                    |
| 18                                                  | Methods (e.g. e.g. self-reported adherence, pill returns) [Open Text]                                                                                                                                                                                              |
| 19                                                  | Results [Open Text]<br>Any additional notes about adherence [Open Text]                                                                                                                                                                                            |
| <b>Clinical/Treatment Outcomes</b>                  |                                                                                                                                                                                                                                                                    |
| 20                                                  | Methods (e.g. clinical cure, viral suppression) [Open Text]                                                                                                                                                                                                        |
| 21                                                  | Results [Open Text]<br>Any additional notes about adherence [Open Text]                                                                                                                                                                                            |

| Acceptability/Administration Outcomes |                                                                                                                                                                                                                                                                                                                                                                                                                                                                                                                                                                                                                                                                                                                                                                                                                                        |
|---------------------------------------|----------------------------------------------------------------------------------------------------------------------------------------------------------------------------------------------------------------------------------------------------------------------------------------------------------------------------------------------------------------------------------------------------------------------------------------------------------------------------------------------------------------------------------------------------------------------------------------------------------------------------------------------------------------------------------------------------------------------------------------------------------------------------------------------------------------------------------------|
| 22                                    | Method of assessment [Open Text]                                                                                                                                                                                                                                                                                                                                                                                                                                                                                                                                                                                                                                                                                                                                                                                                       |
| 23                                    | Outcomes [Multiple Tick Box] <ul style="list-style-type: none"> <li><input type="checkbox"/> Spitting out</li> <li><input type="checkbox"/> Vomiting</li> <li><input type="checkbox"/> Rejecting/resistance</li> <li><input type="checkbox"/> Refusal</li> <li><input type="checkbox"/> Withdrawal from study</li> <li><input type="checkbox"/> Medication stopped</li> <li><input type="checkbox"/> Drug therapy changed</li> <li><input type="checkbox"/> Dosage form changed</li> <li><input type="checkbox"/> Unspecified administration problem</li> <li><input type="checkbox"/> Other [Open Text]</li> </ul>                                                                                                                                                                                                                    |
| 24                                    | Strategies to aid administration [Multiple Tick Box] <ul style="list-style-type: none"> <li><input type="checkbox"/> Mixing with food</li> <li><input type="checkbox"/> Mixing with drinks</li> <li><input type="checkbox"/> Manipulation (crushing tablet/opening capsule)</li> <li><input type="checkbox"/> Administration device</li> <li><input type="checkbox"/> Positive reinforcement e.g. praise, high-fives</li> <li><input type="checkbox"/> Reward</li> <li><input type="checkbox"/> Negotiation</li> <li><input type="checkbox"/> Bribery</li> <li><input type="checkbox"/> Coercion / threats</li> <li><input type="checkbox"/> Physical restraint</li> <li><input type="checkbox"/> Forced administration</li> <li><input type="checkbox"/> Other [Open Text]</li> </ul> Additional notes regarding outcomes [Open Text] |
| Other Study Information               |                                                                                                                                                                                                                                                                                                                                                                                                                                                                                                                                                                                                                                                                                                                                                                                                                                        |
| 25                                    | Other Notes [Open Text]                                                                                                                                                                                                                                                                                                                                                                                                                                                                                                                                                                                                                                                                                                                                                                                                                |



**Table S5** Process of study appraisal for inclusion and analysis in relation to palatability and outcome reports

| Report of Unpalatable/<br>Poor Tasting Medicine                                                                                                                                                                                                                                                                                 |   | Impact on Patient<br>Acceptability                                                                                                                                                                                                                                                                                                                                  | Impact on<br>Medication Adherence                                                                                                                                                                                                                                                                                               | Impact on<br>Therapeutic Outcomes                                                                                                                           | Other                                                                                                                                                                                         |
|---------------------------------------------------------------------------------------------------------------------------------------------------------------------------------------------------------------------------------------------------------------------------------------------------------------------------------|---|---------------------------------------------------------------------------------------------------------------------------------------------------------------------------------------------------------------------------------------------------------------------------------------------------------------------------------------------------------------------|---------------------------------------------------------------------------------------------------------------------------------------------------------------------------------------------------------------------------------------------------------------------------------------------------------------------------------|-------------------------------------------------------------------------------------------------------------------------------------------------------------|-----------------------------------------------------------------------------------------------------------------------------------------------------------------------------------------------|
| <b>Inclusion</b>                                                                                                                                                                                                                                                                                                                |   |                                                                                                                                                                                                                                                                                                                                                                     |                                                                                                                                                                                                                                                                                                                                 |                                                                                                                                                             |                                                                                                                                                                                               |
| <ul style="list-style-type: none"> <li>Formal report: Palatability or taste rated by participant or caregiver</li> <li>Informal report: Authors report a palatability problem <u>and</u> impact, but no formal methodology described AND</li> <li>Any degree of negative response reported by any single participant</li> </ul> | → | <ul style="list-style-type: none"> <li>Rejection response (e.g. spitting out, resistance,).</li> <li>Practical strategies to aid administration (e.g. mixing with food/drink, need for positive reinforcement or forced administration).</li> <li>Impact on prescribing (e.g. drug therapy changed, dose form changed, clinician prescribing decisions).</li> </ul> | <ul style="list-style-type: none"> <li>Adherence measure described (e.g. pill count, self-reported missed doses) and sub-optimal adherence linked to palatability.</li> <li>Taste problem reported as barrier to adherence (e.g. using measurement tool or during semi-structured interview/focus group discussion).</li> </ul> | <ul style="list-style-type: none"> <li>Authors discuss therapeutic outcomes in relation to palatability (correlation or inferred impact stated).</li> </ul> | <ul style="list-style-type: none"> <li>Patient or caregivers' beliefs or opinions about palatability in relation to medicines use (e.g. perceived association with drug efficacy).</li> </ul> |
| <b>Exclusion</b>                                                                                                                                                                                                                                                                                                                |   |                                                                                                                                                                                                                                                                                                                                                                     |                                                                                                                                                                                                                                                                                                                                 |                                                                                                                                                             |                                                                                                                                                                                               |
| <ul style="list-style-type: none"> <li>Product preference in relation to palatability (e.g. product A tasted better than product B).</li> <li>All palatability ratings positive.</li> </ul>                                                                                                                                     |   | <ul style="list-style-type: none"> <li>Authors simply state that palatability can influence acceptability or administration.</li> </ul>                                                                                                                                                                                                                             | <ul style="list-style-type: none"> <li>Authors simply state that palatability can impact adherence, but no formal data captured.</li> </ul>                                                                                                                                                                                     | <ul style="list-style-type: none"> <li>Clinical outcomes reported but findings not linked or discussed in relation to taste.</li> </ul>                     |                                                                                                                                                                                               |

**Table S6** Characteristics of the 225 studies included in the scoping review

| Study Characteristics (N=225)                               | N (%)     |
|-------------------------------------------------------------|-----------|
| <b>Publication Year</b>                                     |           |
| 1980 - 1989                                                 | 5 (2%)    |
| 1990 – 1999                                                 | 29 (13%)  |
| 2000 – 2009                                                 | 53 (24%)  |
| 2010 - 2019                                                 | 90 (40%)  |
| 2020 – June 2023                                            | 48 (21%)  |
| <b>Publication Type</b>                                     |           |
| Journal article                                             | 193 (86%) |
| Conference proceeding                                       | 28 (12%)  |
| Letter                                                      | 4 (2%)    |
| <b>Study Design</b>                                         |           |
| Interventional - Randomized controlled trial                | 86 (38%)  |
| Interventional - Uncontrolled trial                         | 34 (15%)  |
| Interventional - Non-randomized control trial               | 14 (6%)   |
| Observational - Cross Sectional                             | 57 (25%)  |
| Observational - Other (e.g. cohort, case study)             | 34 (15%)  |
| <b>Geographical Region</b>                                  |           |
| Europe & Central Asia                                       | 74 (33%)  |
| North America                                               | 65 (29%)  |
| Sub-Saharan Africa                                          | 23 (10%)  |
| East Asia & Pacific                                         | 19 (8%)   |
| Multinational                                               | 18 (8%)   |
| South Asia                                                  | 12 (5%)   |
| Middle East & North Africa                                  | 8 (4%)    |
| Latin America & Caribbean                                   | 6 (3%)    |
| <b>Research in LMICs</b>                                    |           |
| Yes – study site includes LMIC                              | 68 (30%)  |
| No - high income country only                               | 157 (70%) |
| <b>Pediatric Age Group (if included in study age range)</b> |           |
| Preterm newborn infants                                     | 0 (0%)    |
| Term newborn infants (0 to 27 days)                         | 33 (15%)  |
| Infants and toddlers (28 days to 23 months)                 | 91 (40%)  |
| Pre-school children (2-5 years)                             | 159 (71%) |
| School children (6-11 years)                                | 167 (74%) |

|                           |           |
|---------------------------|-----------|
| Adolescents (12-18 years) | 128 (57%) |
| Age range not specified   | 20 (9%)   |

**Overall study classification**

|                                                                        |           |
|------------------------------------------------------------------------|-----------|
| Palatability issue informally reported and linked with outcome(s)      | 105 (47%) |
| Palatability issue formally captured and linked with outcome(s)        | 48 (21%)  |
| Palatability issue formally captured but no link with outcome(s)       | 48 (21%)  |
| Palatability issue formally captured with potential link to outcome(s) | 19 (8%)   |
| General experiences of patient, caregiver, and/or HCP only             | 5 (2%)    |

**Table S7** Disease areas reported in the 225 studies by WHO ICD-11 Classification

| ICD-11 Classification by Chapter                                                            | N (%)              |
|---------------------------------------------------------------------------------------------|--------------------|
| <b>01 Certain infectious or parasitic diseases</b>                                          | <b>46 (20.44%)</b> |
| Human immunodeficiency virus (HIV) infection                                                | 28                 |
| Malaria                                                                                     | 7                  |
| Tuberculosis (TB)                                                                           | 4                  |
| Giardiasis                                                                                  | 2                  |
| Chronic hepatitis C virus (HCV) infection                                                   | 2                  |
| Cholera (oral vaccination)                                                                  | 1                  |
| Bacterial cellulitis, erysipelas or lymphangitis (bacterial skin infections)                | 1                  |
| Amoebiasis                                                                                  | 1                  |
| <b>02 Neoplasms</b>                                                                         | <b>3 (1.3%)</b>    |
| Gliomas of brain and other solid tumours                                                    | 2                  |
| Acute lymphoblastic leukaemia                                                               | 1                  |
| <b>03 Diseases of the blood or blood-forming organs</b>                                     | <b>14 (6.2%)</b>   |
| Iron overload diseases (in transfusion dependent hematologic disorders)                     | 8                  |
| Sickle cell disorders or other haemoglobinopathies                                          | 3                  |
| Iron deficiency anaemia                                                                     | 2                  |
| Beta thalassaemia                                                                           | 1                  |
| <b>04 Diseases of the immune system</b>                                                     | <b>2 (0.9%)</b>    |
| Allergic or hypersensitivity conditions                                                     | 2                  |
| <b>05 Endocrine, nutritional or metabolic diseases</b>                                      | <b>18 (8.0%)</b>   |
| Dehydration (in diarrhoea or burn injury)                                                   | 6                  |
| Urea cycle disorders (inborn errors of metabolism)                                          | 5                  |
| Vitamin D deficiency                                                                        | 4                  |
| Homocystinuria (Inborn errors of metabolism)                                                | 1                  |
| Maple-syrup-urine disease (Inborn errors of metabolism)                                     | 1                  |
| Hypercholesterolemia (disorders of lipoprotein metabolism or certain specified lipidaemias) | 1                  |
| <b>06 Mental, behavioural or neurodevelopmental disorders</b>                               | <b>2 (0.9%)</b>    |
| Developmental learning disorder                                                             | 1                  |
| Autism spectrum disorders                                                                   | 1                  |
| <b>08 Diseases of the nervous system</b>                                                    | <b>4 (1.8%)</b>    |
| Epilepsy or seizures                                                                        | 4                  |
| <b>10 Diseases of the ear or mastoid process</b>                                            | <b>9 (4.0%)</b>    |
| Acute otitis media (bacterial ear infection)                                                | 9                  |

| <b>ICD-11 Classification by Chapter</b>                                   | <b>N (%)</b>     |
|---------------------------------------------------------------------------|------------------|
| <b>11 Diseases of the circulatory system</b>                              | <b>6 (2.7%)</b>  |
| Hypertensive renal disease                                                | 3                |
| Venous thromboembolism                                                    | 2                |
| Hypertension                                                              | 1                |
| <b>12 Diseases of the respiratory system</b>                              | <b>15 (6.7%)</b> |
| Asthma                                                                    | 6                |
| Cystic fibrosis                                                           | 2                |
| Acute pharyngitis (upper respiratory tract disorders)                     | 2                |
| Pharyngotonsillitis (upper respiratory tract disorders)                   | 1                |
| Interstitial lung diseases associated with metabolic diseases             | 1                |
| Pneumonia (lung infections)                                               | 1                |
| Asthma / Croup                                                            | 1                |
| Asthma / Wheeze                                                           | 1                |
| <b>13 Diseases of the digestive system</b>                                | <b>20 (8.9%)</b> |
| Functional constipation of infants, toddlers or children                  | 7                |
| Dental caries                                                             | 5                |
| Oral mucositis                                                            | 2                |
| Gastro-oesophageal reflux disease                                         | 2                |
| Eosinophilic oesophagitis                                                 | 1                |
| Liver diseases (Wilson disease, autoimmune liver disease, and transplant) | 1                |
| Dental caries / Gingival diseases                                         | 1                |
| Inflammatory bowel diseases                                               | 1                |
| <b>14 Diseases of the skin</b>                                            | <b>1 (0.4%)</b>  |
| Plaque psoriasis                                                          | 1                |
| <b>15 Diseases of the musculoskeletal system or connective tissue</b>     | <b>3 (1.3%)</b>  |
| Juvenile idiopathic arthritis                                             | 3                |
| <b>16 Diseases of the genitourinary system</b>                            | <b>4 (1.8%)</b>  |
| Renal tubular acidosis                                                    | 2                |
| Neuromuscular dysfunction of bladder                                      | 1                |
| Neuromuscular dysfunction of bladder / Overactive bladder                 | 1                |
| <b>19 Certain conditions originating in the perinatal period</b>          | <b>2 (0.9%)</b>  |
| Neonatal hypomagnesaemia                                                  | 2                |
| <b>21 Symptoms, signs or clinical findings, not elsewhere classified</b>  | <b>19 (8.4%)</b> |
| Pain                                                                      | 5                |
| Pain / Fever                                                              | 4                |

| ICD-11 Classification by Chapter                                                                                                 | N (%)            |
|----------------------------------------------------------------------------------------------------------------------------------|------------------|
| Nausea or vomiting (chemotherapy induced, post-operative or in acute gastroenteritis)                                            | 4                |
| Fever                                                                                                                            | 2                |
| Diarrhoea                                                                                                                        | 2                |
| Wheeze                                                                                                                           | 1                |
| Cough                                                                                                                            | 1                |
| <b>22 Injury, poisoning or certain other consequences of external causes</b>                                                     | <b>12 (5.3%)</b> |
| Failure or rejection of transplanted organs or tissues: Bone marrow, heart, hematopoietic stem cell transplant, kidney, or liver | 10               |
| Poisoning (harmful effects of substances)                                                                                        | 2                |
| <b>X Extension codes: Medicaments</b>                                                                                            | <b>15 (6.7%)</b> |
| Medical procedure - Sedation and premedication                                                                                   | 10               |
| Diagnostics - Laxatives for colonoscopy                                                                                          | 3                |
| Diagnostics - Contrast Media                                                                                                     | 2                |
| <b>Bacterial infections, Multiple indications</b>                                                                                | <b>15 (6.7%)</b> |
| Includes studies using antimicrobials for various indications such as:                                                           |                  |
| <i>01 Certain infectious or parasitic diseases</i>                                                                               |                  |
| Bacterial cellulitis, erysipelas or lymphangitis (bacterial skin infections)                                                     |                  |
| <i>10 Diseases of the ear or mastoid process</i>                                                                                 |                  |
| Acute otitis media (bacterial ear infection)                                                                                     |                  |
| <i>12 Diseases of the respiratory system</i>                                                                                     |                  |
| Acute bronchitis (lung infections)                                                                                               |                  |
| Acute laryngitis or tracheitis (upper respiratory tract disorders)                                                               |                  |
| Acute laryngopharyngitis (upper respiratory tract disorders)                                                                     |                  |
| Acute nasopharyngitis (upper respiratory tract disorders)                                                                        |                  |
| Acute pharyngitis (upper respiratory tract disorders)                                                                            |                  |
| Acute sinusitis (upper respiratory tract disorders)                                                                              |                  |
| Acute tonsillitis (upper respiratory tract disorders)                                                                            |                  |
| Bronchitis (certain lower respiratory tract diseases)                                                                            |                  |
| Infection prevention (in chemotherapy)                                                                                           |                  |
| Lung infections (in cystic fibrosis)                                                                                             |                  |
| Pharyngotonsillitis (upper respiratory tract disorders)                                                                          |                  |
| Pneumonia (lung infections)                                                                                                      |                  |
| <i>13 Diseases of the digestive system</i>                                                                                       |                  |
| Dental abscess (diseases of pulp or periapical tissues)                                                                          |                  |
| <i>16 Diseases of the genitourinary system</i>                                                                                   |                  |
| Acute pyelonephritis                                                                                                             |                  |
| Urinary tract infection, site not specified New                                                                                  |                  |

| ICD-11 Classification by Chapter                                         | N (%)     |               |
|--------------------------------------------------------------------------|-----------|---------------|
| <i>21 Symptoms, signs or clinical findings, not elsewhere classified</i> |           |               |
| Pleurisy (symptoms or signs involving the respiratory system)            |           |               |
| <b>Non-specific disease area</b>                                         | <b>15</b> | <b>(6.7%)</b> |
| Non-specific disease area                                                | <b>15</b> | <b>(6.7%)</b> |

**Table S8** Drugs and medicinal products reported in the 225 studies by WHO ATC classification

| ATC Anatomical Main Group (1 <sup>st</sup> Level)<br>Pharmacological Subgroup (3 <sup>rd</sup> Level) | ATC Code | Chemical Substance               | N | References                                                                                                                                           |
|-------------------------------------------------------------------------------------------------------|----------|----------------------------------|---|------------------------------------------------------------------------------------------------------------------------------------------------------|
| <b>A ALIMENTARY TRACT AND METABOLISM</b>                                                              |          |                                  |   |                                                                                                                                                      |
| A01A Stomatological Preparations                                                                      | A01AB03  | Chlorhexidine                    | 4 | Cheng 2004<br>Jain 2013<br>Nezam 2022<br>Splieth 2000                                                                                                |
|                                                                                                       | A01AA01  | Sodium fluoride                  | 1 | Berg 2006                                                                                                                                            |
|                                                                                                       | A01AD02  | Benzydamine                      | 1 | Cheng 2004                                                                                                                                           |
|                                                                                                       | A01AD11  | Enzyme containing mouthwash      | 1 | Hoffstedt 2023                                                                                                                                       |
| A02A Antacids                                                                                         | A02AH    | Antacids with sodium bicarbonate | 1 | Claes 2014                                                                                                                                           |
| A02B Drugs for peptic ulcer and gastro-oesophageal reflux disease (GORD)                              | A02BA02  | Ranitidine                       | 2 | Ameen 2006<br>Venables 2015b                                                                                                                         |
|                                                                                                       | A02BC01  | Omeprazole                       | 1 | Venables 2015b                                                                                                                                       |
|                                                                                                       | A02BC04  | Rabeprazole                      | 1 | Zannikos 2011                                                                                                                                        |
| A03F Propulsives                                                                                      | A03FA03  | Domperidone                      | 1 | Venables 2015b                                                                                                                                       |
| A04A Antiemetics and antinauseants                                                                    | A04AA01  | Ondansetron                      | 4 | Cohen 2005<br>Ibrahim 2016<br>Nathan 2006<br>Stevens 1996                                                                                            |
|                                                                                                       | A04AD05  | Metopimazine                     | 1 | Nathan 2006                                                                                                                                          |
| A06A Drugs for constipation                                                                           | A06AD15  | Macrogol                         | 9 | Imanieh 2022<br>Nimrouzi 2015<br>Rendeli 2006<br>Saneian 2012<br>Savino 2012<br>Sondheimer 1991<br>Venables 2015a<br>Venables 2015b<br>Voskuijl 2004 |
|                                                                                                       | A06AD11  | Lactulose                        | 5 | Kokke 2008<br>Rendeli 2006<br>Saneian 2012<br>Venables 2015b<br>Voskuijl 2004                                                                        |
|                                                                                                       | A06AD65  | Macrogol, combinations           | 3 | Baker 2021                                                                                                                                           |



| ATC Anatomical Main Group (1 <sup>st</sup> Level)<br>Pharmacological Subgroup (3 <sup>rd</sup> Level) | ATC Code | Chemical Substance                         | N | References                                                                                                     |
|-------------------------------------------------------------------------------------------------------|----------|--------------------------------------------|---|----------------------------------------------------------------------------------------------------------------|
|                                                                                                       |          |                                            |   | Matsumoto 2022<br>Savino 2012                                                                                  |
|                                                                                                       | A02AA04  | Magnesium hydroxide                        | 1 | Saneian 2012                                                                                                   |
| A07B Intestinal adsorbents                                                                            | A07BA01  | Medicinal charcoal                         | 2 | Dagnone 2002<br>Osterhoudt 2004                                                                                |
| A07C Electrolytes with carbohydrates                                                                  | A07CA    | Oral rehydration salt formulations         | 7 | Baker 2021<br>Caglayan 1989<br>Freedman 2010<br>Gyedu 2023<br>Nizami 1996<br>Pichichero 1990<br>Touchette 1994 |
| A07E Intestinal anti-inflammatory agents                                                              | A07EA06  | Budesonide                                 | 1 | Warzecha 2022                                                                                                  |
| A09A Digestives, including enzymes                                                                    | A09AA02  | Multienzymes (lipase, protease etc.)       | 2 | Christiansen 2014<br>VandeVijver 2011                                                                          |
| A11B Multivitamins, plain                                                                             | A11BA    | Multivitamins                              | 1 | Tiengkate 2022                                                                                                 |
| A11C Vitamin A and D, including combinations of the two                                               | A11CC    | Vitamin D and analogues                    | 5 | Bartoli 2006<br>Claes 2014<br>Lava 2011<br>Penagini 2017<br>Pronzini 2008                                      |
| A12B Potassium                                                                                        | A12BA30  | Potassium (different salts in combination) | 1 | Bertholet-Thomas 2021                                                                                          |
| A12C Other mineral supplements                                                                        | A12CB01  | Zinc sulfate                               | 3 | Nasrin 2005<br>Nuzhat 2022<br>Suchismita 2023                                                                  |
|                                                                                                       | A12CC    | Magnesium                                  | 2 | Mettey 1990                                                                                                    |
|                                                                                                       | A12CB02  | Zinc gluconate                             | 1 | Macknin 1998                                                                                                   |
| A16A Other alimentary tract and metabolism products                                                   | A16AX03  | Sodium phenylbutyrate                      | 3 | Kibleur 2014<br>Shchelochkov 2016<br>Yeowell 2021                                                              |
|                                                                                                       | A16AX11  | Sodium benzoate                            | 3 | Gaskell 2016                                                                                                   |

| ATC Anatomical Main Group (1 <sup>st</sup> Level)<br>Pharmacological Subgroup (3 <sup>rd</sup> Level) | ATC Code | Chemical Substance               | N | References                                     |
|-------------------------------------------------------------------------------------------------------|----------|----------------------------------|---|------------------------------------------------|
|                                                                                                       |          |                                  |   | Maines 2020<br>Yeowell 2021                    |
|                                                                                                       | A16AA03  | Glutamine                        | 1 | Gotesman 2020                                  |
|                                                                                                       | A16AA06  | Betaine                          | 1 | Valayannopoulos 2019                           |
|                                                                                                       | A16AA    | Isoleucine (amino acid)          | 1 | Goyanes 2019                                   |
|                                                                                                       | A16AA    | L-arginine (amino acid)          | 1 | Gaskell 2016                                   |
| <b>B BLOOD AND BLOOD FORMING ORGANS</b>                                                               |          |                                  |   |                                                |
| B01A Antithrombotic agents                                                                            | B01AF01  | Rivaroxaban                      | 1 | Young 2020                                     |
|                                                                                                       | B01AC24  | Ticagrelor                       | 1 | DunivaInusa 2021                               |
| B03A Iron preparations                                                                                | B03AA    | Iron bivalent, oral preparations | 3 | DelRosso 2020<br>Powers 2020<br>Venables 2015b |
| B03B Vitamin B12 and folic acid                                                                       | B03BB01  | Folic acid                       | 1 | Venables 2015b                                 |
| <b>C CARDIOVASCULAR SYSTEM</b>                                                                        |          |                                  |   |                                                |
| C08C Selective calcium channel blockers with mainly vascular effects                                  | C08CA01  | Amlodipine                       | 2 | Milani 2010<br>vanderVossen 2020               |
|                                                                                                       | C08CA13  | Lercanidipine                    | 1 | Milani 2010                                    |
| C09C Angiotensin II receptor blockers (ARBs), plain                                                   | C09CA01  | Losartan                         | 1 | Meier 2007                                     |
|                                                                                                       | C09CA03  | Valsartan                        | 1 | Meier 2007                                     |
|                                                                                                       | C09CA04  | Irbesartan                       | 1 | Meier 2007                                     |
|                                                                                                       | C09CA06  | Candesartan                      | 1 | Meier 2007                                     |
|                                                                                                       | C09CA07  | Telmisartan                      | 1 | Meier 2007                                     |
| C10A Lipid modifying agents, plain                                                                    | C10AC01  | Colestyramine                    | 1 | Liacouras 1993                                 |
| <b>G GENITO URINARY SYSTEM AND SEX HORMONES</b>                                                       |          |                                  |   |                                                |
| G04B Urologicals                                                                                      | G04BD12  | Mirabegron                       | 2 | Baka-Ostrowska 2021<br>Rittig 2020             |

| ATC Anatomical Main Group (1 <sup>st</sup> Level)<br>Pharmacological Subgroup (3 <sup>rd</sup> Level) | ATC Code | Chemical Substance                       | N  | References                                                                                                                                                                                                           |
|-------------------------------------------------------------------------------------------------------|----------|------------------------------------------|----|----------------------------------------------------------------------------------------------------------------------------------------------------------------------------------------------------------------------|
| <b>H SYSTEMIC HORMONAL PREPARATIONS, EXCL. SEX HORMONES AND INSULINS</b>                              |          |                                          |    |                                                                                                                                                                                                                      |
| H02A Corticosteroids for systemic use, plain                                                          | H02AB06  | Prednisolone                             | 13 | Aljebab 2018<br>Cronin 2016<br>Dawson 1993<br>Hames 2008<br>Haslund-Krog 2022<br>Mistry 2018<br>Parshuram 1998<br>Suchismita 2023<br>Taylor 2016<br>Tucker 2002<br>Venables 2015a<br>Venables 2015b<br>Venables 2018 |
|                                                                                                       | H02AB02  | Dexamethasone                            | 2  | Aljebab 2018<br>Hames 2008                                                                                                                                                                                           |
| H03A Thyroid preparations                                                                             | H03AA01  | Levothyroxine                            | 1  | Venables 2015b                                                                                                                                                                                                       |
| <b>J ANTIINFECTIVES FOR SYSTEMIC USE</b>                                                              |          |                                          |    |                                                                                                                                                                                                                      |
| J01C Beta-lactam antibacterials, penicillins                                                          | J01CR02  | Amoxicillin and beta-lactamase inhibitor | 12 | Angelilli 2000<br>Block 2006<br>Cifaldi 2004<br>Cohen 2009<br>Holas 2005<br>Khurana 1996<br>Mistry 2018<br>Phipps 1990<br>Powers 1996<br>Powers 2000<br>Steele 2002<br>Toscani 2000                                  |
|                                                                                                       | J01CA04  | Amoxicillin                              | 5  | Angwa 2020<br>Cohen 2009<br>Dagan 1994<br>Holas 2005<br>Mistry 2018                                                                                                                                                  |
|                                                                                                       | J01CE02  | Phenoxymethylpenicillin                  | 5  | Bagger-Sjoberg 1989<br>Bergene 2019<br>Greenwood 2015<br>Uhari 1986<br>Venables 2015b                                                                                                                                |

| ATC Anatomical Main Group (1 <sup>st</sup> Level)<br>Pharmacological Subgroup (3 <sup>rd</sup> Level) | ATC Code | Chemical Substance                | N | References                                                                                |
|-------------------------------------------------------------------------------------------------------|----------|-----------------------------------|---|-------------------------------------------------------------------------------------------|
| J01D Other beta-lactam antibacterials                                                                 | J01CF05  | Flucloxacillin                    | 4 | Elgammal 2022<br>Greenwood 2015<br>Rouse 2017<br>Venables 2015a                           |
|                                                                                                       | J01CA02  | Pivampicillin                     | 1 | Jahnsen 1987                                                                              |
|                                                                                                       | J01CF02  | Cloxacillin                       | 1 | Matsui 1996                                                                               |
|                                                                                                       | J01DC10  | Cefprozil                         | 6 | Angelilli 2000<br>Holas 2005<br>Powers 1996<br>Powers 2000<br>Steele 2002<br>Toscani 2000 |
|                                                                                                       | J01DD15  | Cefdinir                          | 6 | Block 2005<br>Block 2006<br>Cifaldi 2004<br>Holas 2005<br>Powers 2000<br>Steele 2002      |
|                                                                                                       | J01DD08  | Cefixime                          | 4 | Angelilli 2000<br>Powers 1996<br>Steele 2002<br>Toscani 2000                              |
|                                                                                                       | J01DC02  | Cefuroxime                        | 3 | Dagan 1994<br>Pichichero 1990<br>Steele 2002                                              |
|                                                                                                       | J01DC08  | Loracarbef                        | 3 | ManfordGoochII<br>I 1999<br>Powers 1996<br>Steele 2002                                    |
|                                                                                                       | J01DD13  | Cefpodoxime                       | 3 | Cohen 2009<br>Powers 1996<br>Steele 2002                                                  |
|                                                                                                       | J01DC04  | Cefaclor                          | 2 | Dagan 1994<br>Steele 2002                                                                 |
| J01E Sulfonamides and trimethoprim                                                                    | J01DB01  | Cefalexin                         | 1 | Matsui 1996                                                                               |
|                                                                                                       | J01EE01  | Sulfamethoxazole and trimethoprim | 4 | Dagan 1994<br>Saito 1999<br>Venables 2015a<br>Venables 2015b                              |
|                                                                                                       | J01EA01  | Trimethoprim                      | 1 | Venables 2015b                                                                            |

| ATC Anatomical Main Group (1 <sup>st</sup> Level)<br>Pharmacological Subgroup (3 <sup>rd</sup> Level) | ATC Code | Chemical Substance                     | N  | References                                                                                                                                      |
|-------------------------------------------------------------------------------------------------------|----------|----------------------------------------|----|-------------------------------------------------------------------------------------------------------------------------------------------------|
| J01F Macrolides, lincosamides and streptogramins                                                      | J01FA10  | Azithromycin                           | 8  | Angelilli 2000<br>Block 2005<br>Holas 2005<br>Khurana 1996<br>Porteous 1997<br>Powers 2000<br>Steele 2002<br>Toscani 2000                       |
|                                                                                                       | J01FA09  | Clarithromycin                         | 7  | Abu-Khalaf 2018<br>Elgammal 2022<br>ManfordGoochII I 1999<br>Mistry 2018<br>Powers 1996<br>Steele 2002<br>Venables 2015a                        |
|                                                                                                       | J01FA01  | Erythromycin                           | 2  | Matsui 1996<br>Uhari 1986                                                                                                                       |
|                                                                                                       | J01FA06  | Roxithromycin                          | 1  | Moniot-Ville 1998                                                                                                                               |
| J01M Quinolone antibacterials                                                                         | J01MA12  | Levofloxacin                           | 1  | Purchase 2019                                                                                                                                   |
| J01X Other antibacterials                                                                             | J01XC01  | Fusidic acid                           | 1  | Matsui 1996                                                                                                                                     |
|                                                                                                       | J01XE01  | Nitrofurantoin                         | 1  | Venables 2015a                                                                                                                                  |
|                                                                                                       | J01XB02  | Polymyxin B                            | 1  | Saito 1999                                                                                                                                      |
|                                                                                                       | J01XD02  | Tinidazole                             | 1  | Escobedo 2008                                                                                                                                   |
| J04A Drugs for treatment of tuberculosis                                                              | J04AB02  | Rifampicin                             | 1  | Venables 2015a                                                                                                                                  |
|                                                                                                       | J04AK06  | Delamanid                              | 1  | Garcia-Prats 2022                                                                                                                               |
|                                                                                                       | J04AM05  | Rifampicin, pyrazinamide and isoniazid | 1  | Wademan 2019                                                                                                                                    |
|                                                                                                       | J05AR10  | Lopinavir and ritonavir                | 10 | Coetzee 2015<br>Coetzee 2016<br>Giralt 2019<br>Kekitiinwa 2016<br>Lin 2011<br>Murnane 2017<br>Pasipanodya 2018<br>Purchase 2016<br>Thomson 2015 |

| ATC Anatomical Main Group (1 <sup>st</sup> Level)<br>Pharmacological Subgroup (3 <sup>rd</sup> Level) | ATC Code | Chemical Substance | N | References                                                                                                                            |
|-------------------------------------------------------------------------------------------------------|----------|--------------------|---|---------------------------------------------------------------------------------------------------------------------------------------|
|                                                                                                       |          |                    |   | Venables 2015a                                                                                                                        |
|                                                                                                       | J05AE03  | Ritonavir          | 9 | Allen 2003<br>Chadwick 2005<br>Davies 2008<br>Frange 2018<br>Goode 2003<br>Lin 2011<br>Melvin 1997<br>Reddington 2000<br>VanDyke 2002 |
|                                                                                                       | J05AF01  | Zidovudine         | 5 | PENTA 1999<br>Bunupuradah 2006<br>Goode 2003<br>Lin 2011<br>Nahiry-Ntege 2012                                                         |
|                                                                                                       | J05AE04  | Nelfinavir         | 4 | Goode 2003<br>Lin 2011<br>Reddington 2000<br>VanDyke 2002                                                                             |
|                                                                                                       | J05AF05  | Lamivudine         | 4 | Bunupuradah 2006<br>Coetzee 2016<br>Lin 2011<br>Nahiry-Ntege 2012                                                                     |
|                                                                                                       | J05AF06  | Abacavir           | 3 | Coetzee 2016<br>Lin 2011<br>Nahiry-Ntege 2012                                                                                         |
|                                                                                                       | J05AG01  | Nevirapine         | 3 | Bunupuradah 2006<br>Lin 2011<br>Nahiry-Ntege 2012                                                                                     |
|                                                                                                       | J05AE02  | Indinavir          | 2 | Bunupuradah 2006<br>Lin 2011                                                                                                          |
|                                                                                                       | J05AF02  | Didanosine         | 2 | Bunupuradah 2006<br>Lin 2011                                                                                                          |
|                                                                                                       | J05AF04  | Stavudine          | 2 | Bunupuradah 2006                                                                                                                      |

| ATC Anatomical Main Group (1 <sup>st</sup> Level)<br>Pharmacological Subgroup (3 <sup>rd</sup> Level) | ATC Code | Chemical Substance                          | N | References                                                   |
|-------------------------------------------------------------------------------------------------------|----------|---------------------------------------------|---|--------------------------------------------------------------|
|                                                                                                       |          |                                             |   | Lin 2011                                                     |
|                                                                                                       | J05AG03  | Efavirenz                                   | 2 | Bunupuradah 2006<br>Lin 2011                                 |
|                                                                                                       | J05AE01  | Saquinavir                                  | 1 | Lin 2011                                                     |
|                                                                                                       | J05AE05  | Amprenavir                                  | 1 | Lin 2011                                                     |
|                                                                                                       | J05AF03  | Zalcitabine                                 | 1 | Lin 2011                                                     |
|                                                                                                       | J05AJ01  | Raltegravir                                 | 1 | Nachman 2014                                                 |
|                                                                                                       | J05AP08  | Sofosbuvir                                  | 1 | Rosenthal 2020                                               |
|                                                                                                       | J05AP51  | Sofosbuvir and ledipasvir                   | 1 | Schwarz 2020                                                 |
|                                                                                                       | J05AR    | Abacavir/<br>Lamivudine/Lopinavir/Ritonavir | 1 | Rotsaert 2023                                                |
|                                                                                                       | J05AR01  | Zidovudine and lamivudine                   | 1 | Lin 2011                                                     |
|                                                                                                       | J05AR14  | Darunavir and cobicistat                    | 1 | Dalton 2019                                                  |
| J07A Bacterial vaccines                                                                               | J07AE02  | Cholera, live attenuated                    | 1 | Lagos 1999                                                   |
| <b>L ANTINEOPLASTIC AND IMMUNOMODULATING AGENTS</b>                                                   |          |                                             |   |                                                              |
| L01B Antimetabolites                                                                                  | L01BB02  | Mercaptopurine                              | 2 | Mulla 2016<br>Venables 2015b                                 |
| L01E Protein kinase inhibitors                                                                        | L01EE01  | Trametinib                                  | 1 | Escoda 2017                                                  |
| L01X Other antineoplastic agents                                                                      | L01XD04  | Aminolevulinic acid                         | 1 | Wataya 2017                                                  |
|                                                                                                       | L01XX05  | Hydroxycarbamide (or Hydroxyurea)           | 1 | Prajapati 2022                                               |
| L04A Immunosuppressants                                                                               | L04AD01  | Ciclosporin                                 | 2 | Claes 2014<br>Tucker 2002                                    |
|                                                                                                       | L04AD02  | Tacrolimus                                  | 2 | Claes 2014<br>Gamston 2013                                   |
|                                                                                                       | L04AA32  | Apremilast                                  | 1 | Paller 2019                                                  |
|                                                                                                       | L04AF01  | Tofacitinib                                 | 1 | Ruperto 2017                                                 |
|                                                                                                       | L04AX01  | Azathioprine                                | 1 | Tucker 2002                                                  |
|                                                                                                       | L04AX03  | Methotrexate                                | 1 | Scheuern 2017                                                |
| <b>M MUSCULO-SKELETAL SYSTEM</b>                                                                      |          |                                             |   |                                                              |
| M01A Anti-inflammatory and antirheumatic products, non-steroids                                       | M01AE01  | Ibuprofen                                   | 9 | Al-Ani 2016<br>Barnett 2020<br>Celebi 2009<br>Klingmann 2022 |

| ATC Anatomical Main Group (1 <sup>st</sup> Level)<br>Pharmacological Subgroup (3 <sup>rd</sup> Level) | ATC Code | Chemical Substance                            | N | References                                                                                                                     |
|-------------------------------------------------------------------------------------------------------|----------|-----------------------------------------------|---|--------------------------------------------------------------------------------------------------------------------------------|
|                                                                                                       |          |                                               |   | McIntyre 1996<br>Mistry 2018<br>Smith 2013<br>Steans 1990<br>Venables 2015b                                                    |
|                                                                                                       | M01AE03  | Ketoprofen                                    | 2 | Celebi 2009<br>Kokki 2000                                                                                                      |
| <b>N NERVOUS SYSTEM</b>                                                                               |          |                                               |   |                                                                                                                                |
| N02A Opioids                                                                                          | N02AA01  | Morphine                                      | 2 | Jamieson 2021<br>Venables 2015a                                                                                                |
|                                                                                                       | N02AX02  | Tramadol                                      | 1 | Yoo 2022                                                                                                                       |
|                                                                                                       | N02AX06  | Tapentadol                                    | 1 | Beuter 2019                                                                                                                    |
|                                                                                                       | N07BC06  | Diamorphine                                   | 1 | Jamieson 2021                                                                                                                  |
| N02B Other analgesics and antipyretics                                                                | N02BE01  | Paracetamol                                   | 8 | Celebi 2009<br>Klingmann 2022<br>Kolmen 1995<br>McIntyre 1996<br>Mistry 2018<br>Smith 2013<br>Venables 2015a<br>Venables 2015b |
|                                                                                                       | N02BE51  | Paracetamol, combinations excl. psycholeptics | 1 | Jaffe 1983                                                                                                                     |
| N03A Antiepileptics                                                                                   | N03AG01  | Valproic acid                                 | 3 | Cloyd 1992<br>Kirylyuk 2013<br>Venables 2015b                                                                                  |
|                                                                                                       | N03AX14  | Levetiracetam                                 | 2 | Joanne 2018<br>Venables 2015b                                                                                                  |
|                                                                                                       | N03AF01  | Carbamazepine                                 | 1 | Venables 2015b                                                                                                                 |
| N05C Hypnotics and sedatives                                                                          | N05CD08  | Midazolam                                     | 8 | Almenrader 2007<br>Cote 2002<br>Isik 2008<br>Khalil 2003<br>Kumar 2012<br>Marshall 2000<br>Riva 1997<br>Xin 2022               |
|                                                                                                       | N05CC01  | Chloral hydrate                               | 4 | Chung 2000<br>Tiengkate 2022                                                                                                   |



| ATC Anatomical Main Group (1 <sup>st</sup> Level)<br>Pharmacological Subgroup (3 <sup>rd</sup> Level) | ATC Code | Chemical Substance                                                      | N | References                                                  |
|-------------------------------------------------------------------------------------------------------|----------|-------------------------------------------------------------------------|---|-------------------------------------------------------------|
|                                                                                                       |          |                                                                         |   | Venables 2015a<br>Zhang 2016                                |
|                                                                                                       | N05CA01  | Pentobarbital                                                           | 1 | Chung 2000                                                  |
| N07B Drugs used in addictive disorders                                                                | N07BB04  | Naltrexone                                                              | 1 | Kolmen 1995                                                 |
| <b>P ANTIPARASITIC PRODUCTS, INSECTICIDES AND REPELLENTS</b>                                          |          |                                                                         |   |                                                             |
| P01A Agents against amoebiasis and other protozoal diseases                                           | P01AB01  | Metronidazole                                                           | 1 | Canete 2010                                                 |
|                                                                                                       | P01AB07  | Secnidazole                                                             | 1 | Padilla 2000                                                |
| P01B Antimalarials                                                                                    | P01BA01  | Chloroquine                                                             | 4 | Ansah 2001<br>Braga 2015<br>Canete 2010<br>Kolaczinski 2006 |
|                                                                                                       | P01BF01  | Artemether and lumefantrine                                             | 3 | Abdulla 2010<br>Ewing 2015<br>Kedenge 2013                  |
|                                                                                                       | P01BA03  | Primaquine                                                              | 1 | Braga 2015                                                  |
|                                                                                                       | P01BC01  | Quinine                                                                 | 1 | Hofmanova 2020                                              |
|                                                                                                       | P01BD51  | Pyrimethamine, combinations                                             | 1 | Kolaczinski 2006                                            |
|                                                                                                       | P01BF07  | Artemisinin and piperaquine                                             | 1 | Ewing 2015                                                  |
|                                                                                                       |          |                                                                         |   |                                                             |
| <b>R RESPIRATORY SYSTEM</b>                                                                           |          |                                                                         |   |                                                             |
| R01B Nasal decongestants for systemic use                                                             | R01BA52  | Pseudoephedrine, combinations                                           | 1 | Jaffe 1983                                                  |
| R02A Throat preparations                                                                              | R02AA03  | Dichlorobenzyl alcohol                                                  | 1 | Thompson 2013                                               |
| R03D Other systemic drugs for obstructive airway diseases                                             | R03DA04  | Theophylline                                                            | 1 | Rasul 2001                                                  |
| R05D Cough suppressants, excluding combinations with expectorants                                     | R05DA04  | Plain codeine (classified in this group even when used as an analgesic) | 1 | Smith 2013                                                  |
| R06A Antihistamines for systemic use                                                                  | R06AX12  | Terfenadine                                                             | 1 | Holmberg 1994                                               |
|                                                                                                       | R06AX13  | Loratadine                                                              | 1 | Holmberg 1994                                               |
| <b>V VARIOUS</b>                                                                                      |          |                                                                         |   |                                                             |
| V01A Allergens                                                                                        | V01AA20  | Allergen extracts (various)                                             | 1 | Pajno 2012                                                  |

| ATC Anatomical Main Group (1 <sup>st</sup> Level)<br>Pharmacological Subgroup (3 <sup>rd</sup> Level) | ATC Code | Chemical Substance                    | N | References                                                                                           |
|-------------------------------------------------------------------------------------------------------|----------|---------------------------------------|---|------------------------------------------------------------------------------------------------------|
| V03A All other therapeutic products                                                                   | V03AC03  | Deferasirox                           | 6 | Goldberg 2013<br>Holloway 2018<br>Horodniceanu 2017<br>Taher 2018<br>Tsouana 2015<br>Viprakasit 2023 |
|                                                                                                       | V03AE01  | Polystyrene sulfonate                 | 1 | Tiengkate 2022                                                                                       |
|                                                                                                       | V03AB26  | Methionine                            | 1 | Querín 2023                                                                                          |
| V08A X-ray contrast media, iodinated                                                                  | V08AA01  | Diatrizoic acid                       | 1 | Venables 2015a                                                                                       |
|                                                                                                       | V08AA05  | Ioxitalamic acid                      | 1 | Tannous 1991                                                                                         |
| V08B X-ray contrast media, non-iodinated                                                              | V08BA01  | Barium sulfate with suspending agents | 1 | Dillman 2018                                                                                         |

#### OTHER INTERVENTIONAL PRODUCTS

|                                     |                                     |   |               |
|-------------------------------------|-------------------------------------|---|---------------|
| Beverage                            | Breeza as negative contrast media   | 1 | Dillman 2018  |
|                                     | Fiber Mixture                       | 1 | Kokke 2008    |
| Herbal medicine                     | Descurainia sophia seeds            | 1 | Nimrouzi 2015 |
|                                     | Liquorice root extract              | 1 | Jain 2013     |
|                                     | Qingre Huazhi Decoction             | 1 | Hou 2022      |
|                                     | Rosa Damascena                      | 1 | Imanieh 2022  |
|                                     | Terminalia chebula                  | 1 | Palit 2016    |
| Medical device                      | Muco-adhesive oral rinse            | 1 | Gibson 2010   |
| Medicinal substance, not classified | Isobutyramide                       | 1 | Reich 2000    |
|                                     | Quinfamide                          | 1 | Padilla 2000  |
| Probiotic                           | Streptococcus salivarius K12 strain | 1 | DiPierro 2014 |
